1  
2  
3  
4  
5  
6  
7  
8  
9  
10  
11  
12  
13  
14  
15  
16  
17  
18  
19  
20  
21  
22  
23  
24  
25  
26  
27

***First report of enhanced contents of nine macro- and micronutrients in gymnosperms via arbuscular mycorrhizal fungi***

Alicia Franco<sup>1</sup>, Jesús Pérez-Moreno<sup>1,2\*</sup>, Gabriela Sánchez<sup>3</sup>, Carlos R. Cerdán<sup>3</sup>, Juan J. Almaraz<sup>1</sup>, Víctor M. Cetina<sup>4</sup>, Alejandro Alarcón<sup>1</sup>

<sup>1</sup>Microbiología, Edafología, Campus Montecillo, Colegio de Posgraduados, Montecillo, Texcoco, México

<sup>2</sup>Kunming Institute of Botany, Chinese Academy of Sciences, Kunming, Yunnan, China.

<sup>3</sup>Facultad en Ciencias Agrícolas, Universidad Veracruzana, Xalapa, Veracruz, México

<sup>4</sup>Programa Forestal, Campus Montecillo, Colegio de Posgraduados, Montecillo, Texcoco, México

\*Corresponding author

E-mail: [jperez@colpos.mx](mailto:jperez@colpos.mx)      [jepemo@yahoo.com.mx](mailto:jepemo@yahoo.com.mx)

Short title: Nutrient enhancement in gymnosperms via arbuscular mycorrhiza

## 28 **Abstract**

29

30 Traditionally, it is thought that arbuscular mycorrhizae establish a mutualist symbiosis only with  
31 the roots of angiosperm plants. In this mutualism, fungi receive carbon from the plants, and  
32 angiosperms receive nutrients through the external mycelium of the arbuscular mycorrhizal fungi  
33 (AMF). However, the enhanced contents of macro- and micronutrients in gymnosperm plants, and  
34 therefore the mutualistic relationship, with AMF has not been reported so far. The present work  
35 evaluated whether arbuscular mycorrhizae were able to establish and enhance 9 nutrient contents  
36 in the neotropical Pinaceae species *Pinus greggii*. The tree seedlings were inoculated with three  
37 consortia of AMF isolated from an agricultural site, a forest of *Cupressus lusitanica* and a forest  
38 of *Pinus hartwegii*. The effect of AMF inoculation on plant growth and nutrient enhancement, in  
39 addition to colonization, was evaluated. There was evidence of enhancement of plant growth and  
40 9 macro- and micronutrients in plants inoculated with the three evaluated consortia. After 7  
41 months, the translocation was greater for Mg, Mn and Zn in plants inoculated with the consortium  
42 of AMF from pine forest. The presence of hyphae, vesicles and arbuscules was detected in the  
43 roots of the *Pinus greggii* plants inoculated with the AMF consortia. In addition to these positive  
44 effects, colonization of 10 to 15% and 20 to 38% was observed depending on the AMF consortia  
45 after 2 and 7 months, respectively. The presence of arbuscules which is the translocation structure  
46 among involved symbionts was also recorded; and photographed for the first time. In the present  
47 work, we report for the first time that arbuscular mycorrhiza affects the mobilization of N, P, K,  
48 Ca, Mg, Fe, Mn, Zn, Cu and B in gymnosperms, indicating that this mycorrhizal symbiosis is more  
49 complex than previously believed.

50

51 Keywords: Arbuscular mycorrhiza, forests, *Glomeromycota*, *Pinaceae*, Neotropics, nutrient contents

52

## 53 **Introduction**

54

55 Under natural conditions, the majority of terrestrial plants form symbioses with mycorrhizae.  
56 Arbuscular mycorrhizal fungi (AMF) [1] are native to all terrestrial ecosystems and can be found  
57 in almost all soils [2]. These fungi are members of the phylum *Glomeromycota* [3,4] and are  
58 important components in the soil rhizosphere because they serve multiple functions in ecosystems,  
59 favour the growth of plants and facilitate the absorption of nutrients, including P, N and water  
60 [5,6]. AMF have been reported in most vascular plants, primarily in angiosperms. In contrast, it  
61 has been generally considered that gymnosperms are generally colonized by ectomycorrhizal  
62 fungi. However, there are some reports of colonization by AMF in *Pinaceae* [7, 8, 9]. For example,  
63 the presence of AMF vesicles in the roots of *Pseudotsuga menziesii* has been reported [15].  
64 Additionally, several authors have reported AMF vesicles and hyphae in the roots of five other  
65 species of *Pinaceae* in the genera *Tsuga* [11, 12, 13], *Pinus* [14, 7, 15] and *Abies* [7]. Although the  
66 presence of AMF has been documented in six gymnosperm species, its functional importance in  
67 terms of nutrient enhancement has not been shown in this group of plants, which includes  
68 numerous species of importance to forests. In the present work, we studied the effect of the  
69 inoculation of three consortia of AMF on the growth and macronutrient (N, P, K, Ca and Mg) and  
70 micronutrient (Fe, Mn, Zn, Cu and B) content in the neotropical pine *Pinus greggii*. Mycorrhizal  
71 colonization was evaluated 2 and 7 months after inoculation.

72

## 73 **Materials and methods**

74

## 75 **Biological materials and inoculum production**

76 Rhizospheric soil was collected from three sites located in the community of San Pablo Ixayoc,  
77 Texcoco, state of Mexico over an altitude gradient of 2,650 m in the agricultural area, 2,700 m in  
78 the *Cupressus lusitanica* forest and 3,600 m in the *Pinus hartwegii* forest located on the western  
79 slope of the Tláloc Mountains, municipality of Texcoco. The rhizospheric soil of each site was  
80 used as an inoculum to propagate the AMF in each ecosystem. Pots with a 2 kg capacity were  
81 used, to which were added sterile river sand, 500 g of rhizospheric soil, and the seeds of corn and  
82 common grass (*Brachiaria decumbens*). These systems were used for the purpose of propagating  
83 the AMF present, with five pots per ecosystem over three months. Subsequently, the species  
84 present were identified and were termed the agricultural consortium (CSA), the cedar consortium  
85 (CSC) and the pine consortium (CSP).

86

## 87 **Inoculation of trees**

88 We used *Pinus greggii* trees and obtained the seeds from a plantation in central Mexico in Toluca,  
89 state of Mexico. Prior to sowing, the seeds of *P. greggii* were soaked in distilled water for 24 hours  
90 to eliminate germination inhibiting compounds. The water was changed every seven hours to allow  
91 for the oxygenation of the embryos. The seeds were sterilized with 30% H<sub>2</sub>O<sub>2</sub> for 20 minutes and  
92 rinsed with sterile distilled water under aseptic conditions. Once disinfected, the seeds were  
93 washed again for 15 minutes with sterile distilled water. Seeds were planted in a plastic container  
94 at a depth of 0.5 cm. Once germinated, the plants were transplanted into plastic tubes measuring  
95 140 cm<sup>3</sup> that contained the substrate, a mixture of river sand, crushed pine bark and forest soil at  
96 a 2:2:1 ratio. The substrate was sterilized with steam at 125 °C for 9 hours. Before transplanting,

97 the tubes were filled at their base with a layer of sterilized tezontle to allow the flow of water  
98 during the experiment, and the rest was filled with sterilized substrate, including a layer of AMF  
99 of inoculum, according to the proposed treatments. A parallel set of plants was also set up without  
100 AMF inoculation according to the treatments. During the first 2 months after germination, a Captan  
101 solution was applied at a dose of 2 gL<sup>-1</sup> of water every third day, for 20 days, followed by one  
102 application per week until the lignification of the stem occurred to avoid "damping off", a disease  
103 commonly caused by *Phytophthora* sp., *Pythium* sp. and *Fusarium circinatum* [16]. The plants  
104 remained under greenhouse conditions for 210 days, at which time harvest was performed. The  
105 height, dry weight of the shoots and the roots, and mycorrhizal colonization were evaluated. A  
106 nutrient analysis was performed for N, P, K, Ca, Mg, Fe, Mn, Zn and B.

107

## 108 **Macro and micronutrients**

109 Nutrient analyses were performed on the 10 plants used for the evaluation of dry weight. The N  
110 was determined by the semimicro-Kjeldahl method [17]. The total P was determined according to  
111 the method by Allen et al. [18]; K was extracted with ammonium acetate and measured by flame  
112 photometry. Ca, Mg, Fe, Cu, Mn, Zn and B were determined using atomic absorption  
113 spectrophotometry (Varian, Spectra-AA220).

114

## 115 **Mycorrhization**

116 An adaptation of the clearing and staining method proposed by Phillips and Hayman was used  
117 [19]. The roots of *P. greggii* were placed in sterilisable plastic capsules in a beaker containing 10%  
118 KOH and incubated overnight. The following day, the samples were decanted and rinsed with  
119 running water. This process was repeated for five consecutive days. Next, H<sub>2</sub>O<sub>2</sub> was applied for 1

120 hour, decanted and then rinsed with running water. Subsequently, 10% HCL was added for 1 hour  
121 and decanted, and then, 0.05% trypan blue dye was applied in lactoglycerol for 24 hours. The roots  
122 were cut into 1 cm long fragments that were then mounted on slides. Microscopic analysis was  
123 performed using light field optical microscopy to quantify the following AMF structures: hyphae,  
124 vesicles and arbuscules.

125

## 126 **Evaluation of variables**

127 All *P. greggii* plants were harvested 7 months after sowing. At harvest, the height of the plants  
128 was evaluated, from the neck of the roots to the upper region of the apical bud. Each plant was  
129 extracted from the containers, and the root system was cut from the stem to the neck of the root.  
130 Subsequently, we performed a wash under running water to extract the largest amount of the root  
131 system. Sieves (0.180 and 0.085 mm) were used to reduce the loss of short roots. Next, to  
132 determine their dry weight, both the stems and the root system were dried at 80° C for 48 hours to  
133 a constant weight. This process was performed in 10 plants per treatment, as five plants were used  
134 to measure mycorrhizal colonization.

135

## 136 **Experimental design**

137 The experimental design used four completely randomized treatments, including an uninoculated  
138 control and three treatments of plants inoculated with consortia of AMF isolated from agricultural  
139 soil, soil from a *Cupressus lusitanica* forest and soil from a *Pinus hartwegii* forest. These  
140 ecosystems were located in an altitudinal gradient ranging from 2,650 m in the agricultural area to  
141 2,700 m in the *Cupressus* forest and 3,600 m in the *P. hartwegii* forest. Each of the four treatments,

142 had 15 replicates; thus, the experiment consisted of a total of 60 experimental units, each consisting  
143 of a tree.

144

## 145 **Statistical analysis**

146 For the variables of height, dry weight of the shoots and roots and nutritional content, an analysis  
147 of variance was performed, and a comparison of means was performed using Tukey's test ( $P \leq 0.05$ )  
148 with the program Statistical Analysis System (SAS) [20]. The colonization data were transformed  
149 to their natural logarithms to meet the criteria of normality.

150

## 151 **Results**

152

### 153 **Identification of AMF**

154 The AMF morphotaxa of the three consortia studied were identified. The genera that predominated  
155 were *Glomus* and *Acaulospora*. In the agricultural area, *Cupressus lusitanica* forest and *Pinus*  
156 *hartwegii* forest, we found 16, 13 and 10 morphospecies of AMF, respectively (Fig 1).  
157 *Acaulospora scrobiculata* and *Archaeospora* sp. were found in all three sample areas.  
158 *Funneliformis mosseae* and *Scutellospora cerradensis* were found in both the agricultural area and  
159 in the *Cupressus lusitanica* forest.

160

161 Figure 1. Species of arbuscular mycorrhizal fungi belonging to each of the three evaluated  
162 consortiums: fungi associated with the rhizosphere of the vegetation of the agricultural area (From  
163 A to F). A) *Scutellospora cerradensis* showing in (a) its helper cells; B) *Scutellospora pellucida*

164 showing in (b) a broken spore; C) and D) *Septoglomus constrictum*; E) *Funneliformis mosseae*; F)  
165 *Gigaspora* sp.; Mycorrhizal fungi associated with the rhizosphere of the vegetation of *Cupressus*  
166 *lusitanica* (From G to L). G) *Claroideglomus etunicatum*; H) *Scutellospora cerradensis*; I)  
167 *Funneliformis mosseae*; J) *Acaulospora mellea*; K) *Archaeospora* sp.; L) *Acaulospora excavata*.  
168 Mycorrhizal fungi associated with the rhizosphere of *Pinus hartwegii* vegetation (From M to Q).  
169 M) and N) *Archaeospora* sp .; Ñ) *Acaulospora laevis*; O) *Glomus* sp.; P) *Paraglomus* sp.; Q)  
170 *Acaulospora* sp. Bar = 50 µm

171

## 172 **Plant growth**

173 The *P. greggii* plants inoculated with the three AMF consortia showed increases in terms of growth  
174 and nutritional content. We observed an increase in height in mycorrhized plants compared to non-  
175 mycorrhized plants, which was independent of the evaluation time and the inoculated mycorrhizal  
176 consortium (Fig 2 a). Similar results were reported for *Abies lasiocarpa* when cultivated with AMF  
177 and a trap plant. We observed an increase in the dry weight of the shoots, especially 7 months after  
178 sowing, in inoculated plants compared to non-inoculated plants, regardless of the consortium (Fig  
179 2 b). We observed an increase in the biomass of root dry weight 7 months after sowing in plants  
180 inoculated with AMF from the *Cupressus lusitanica* and *Pinus hartwegii* forests compared to those  
181 from the agricultural soil (Fig 2 c). In all three cases, the radical dry weight values were higher  
182 than those registered in non-inoculated plants (Fig 2 c). A trend similar to that recorded for the dry  
183 weight of the root was observed in the case of total dry weight (Fig 2 d).

184

185



186 Figure 2. Growth of *Pinus greggii* a) Shoot height; b) Dry weight of the shoot; c) Dry weight of  
187 the root; d) Total dry weight. Inoculated with three consortia of arbuscular mycorrhizal fungi. CSA  
188 = consortium of agricultural land, CSC = Consortium of forest of *Cupressus lusitanica* and CSP =  
189 consortium of *Pinus hartwegii*. White bars = Plants 2 months old; Gray bars = 7-month-old plants.  
190 Equal letters above bars of the same color indicate equal values (Tukey,  $\alpha = 0.05$ );  $n = 10 \pm$   
191 standard error of the mean.

192

## 193 **Mycorrhizal colonization**

194 Differences were observed in terms of mycorrhizal colonization 2 and 7 months after sowing.  
195 Colonization values were 2.2 to 3.2 times higher 7 months after sowing, depending on the AMF  
196 consortium. The inoculated plants had mycorrhizal colonization values ranging from 20.5 to  
197 35.5%, depending on the consortia (Fig 3). The presence of hyphae, vesicles and arbuscules was  
198 observed, as was the germination of AMF spores. In non-inoculated plants, no mycorrhizal  
199 colonization was observed (Fig 4).

200

201 Figure 3. Colonization of *Pinus greggii* plants inoculated with three consortia of arbuscular  
202 mycorrhizal fungi. CSA = consortium of agricultural land, CSC = consortium of *Cupressus*  
203 *lusitanica* and CSP = consortium of *Pinus hartwegii*. White bars = Plants 2 months old; Gray bars  
204 = 7-month-old plants. Equal letters above bars of the same color are equal (Tukey,  $\alpha = 0.05$ ); n =  
205  $5 \pm$  standard error of the mean.

206

207 Figure 4. Colonization by arbuscular mycorrhizal fungi in *Pinus greggii* (Pg) seven months after  
208 inoculation, showing vesicles, external mycelium and arbuscules. A) Root of Pg showing radical  
209 hairs (double arrow) typical from pine roots; B) Close-up to a germinating *Glomus* sp. spore  
210 (arrow); C) Root of Pg showing abundant formation of vesicles (double arrow) and short feeding  
211 roots (arrow) typical from pine roots; D) Close-up to vesicles; E) Abundant extraradical hyphae of  
212 AMF; F) Close-up to a vesicle (arrow) within the cortical cells of Pg root from the *Cupressus* forest;  
213 G) and H) Arbuscules within the cortical cells of the Pg root of the AMF consortium of *Pinus*  
214 *hartwegii* forest. Bar = 30  $\mu$ m.

215

216

## 217 **Nutritional content and transport**

218 A higher content of the macronutrients N, P, K, Ca and Mg was observed in the shoots, in the roots  
219 and in total in inoculated plants compared to those not inoculated, regardless of the source of  
220 inoculum. A higher content was observed in plants inoculated with AMF from the *Cupressus*  
221 *lusitanica* forest (Table 1). A similar tendency was observed for the micronutrients Fe, Mn, Zn,  
222 Cu and B in the shoots, in the roots and in total in plants inoculated with AMF from the *Pinus*  
223 *hartwegii* forests (Table 2). The analysis of the nutrient content relationships in the shoots and  
224 roots of inoculated plants versus non-inoculated plants allowed us to determine the efficiency of  
225 nutrient transport resulting from the AMF. Based on these relationships, we observed the greatest  
226 transport for the macronutrients N, P, Mn and B in plants inoculated with AMF from *Pinus*  
227 *hartwegii* forests (Table 3). K, Ca and Mg in plants inoculated with agricultural soil; and Fe, Mn,  
228 Cu and B in plants inoculated with AMF from *Cupressus lusitanica* forests.

229 Table 1. Content of macronutrients (N, P, K, Ca and Mg) of the aerial part and root of *Pinus greggii* plants inoculated with three consortia  
 230 of arbuscular mycorrhizal fungi (AMF), 210 days after sowing.

231

| Treatment ¶                  | N                       | P                      | K            | Ca           | Mg                  |
|------------------------------|-------------------------|------------------------|--------------|--------------|---------------------|
| Aerial part                  |                         |                        |              |              |                     |
| <b>Plants not inoculated</b> | 5.09 ± 0.23c            | 0.19 ± 0.30b           | 1.41 ± 0.04c | 1.22 ± 0.08c | <b>1.35 ± 0.05c</b> |
| Pi with CSA                  | 21.38 ± 0.65b           | 0.79 ± 0.80a           | 2.39 ± 0.21b | 5.98 ± 0.73b | <b>4.63 ± 0.08b</b> |
| Pi with CSP                  | 32.55 ± 0.36a           | 0.89 ± 0.21a           | 2.87 ± 0.28b | 6.10 ± 0.69a | <b>4.20 ± 0.07a</b> |
| Pi with CSC                  | 22.13 ± 0.71b           | 0.99 ± 0.19a           | 3.15 ± 0.36a | 5.75 ± 0.09b | <b>4.81 ± 0.06b</b> |
| Root                         |                         |                        |              |              |                     |
| <b>Plants not inoculated</b> | 6.74 ± 0.21c            | 0.23 ± 0.02c           | 1.11 ± 0.03c | 1.80 ± 0.06b | <b>2.15 ± 0.04b</b> |
| Pi with CSA                  | 18.50 ± 0.58b           | 0.67 ± 0.09b           | 1.78 ± 0.08b | 5.24 ± 0.72a | <b>3.44 ± 0.05a</b> |
| Pi with CSP                  | 23.79 ± 0.61a           | 0.64 ± 0.05b           | 2.19 ± 0.19a | 5.64 ± 0.21a | <b>3.90 ± 0.03a</b> |
| Pi with CSC                  | 19.75 ± 0.51b           | 0.76 ± 0.08a           | 2.63 ± 0.24a | 5.32 ± 0.82a | <b>3.45 ± 0.02a</b> |
| Total                        |                         |                        |              |              |                     |
| <b>Plants not inoculated</b> | 11.83±0.91c             | 0.42±0.12b             | 2.52±0.07c   | 3.02±0.06b   | <b>3.5±0.21b</b>    |
| Pi with CSA                  | 39.88±0.99b             | 1.46±0.06 <sup>a</sup> | 4.17±0.12b   | 11.22±0.82a  | <b>8.07±0.63a</b>   |
| Pi with CSP                  | 56.34±1.03 <sup>a</sup> | 1.53±0.04a             | 5.06±0.08a   | 11.74±0.79a  | <b>8.1±0.56a</b>    |
| Pi with CSC                  | 41.88±0.97b             | 1.75±0.21a             | 5.78±0.09a   | 11.07±0.81a  | <b>8.26±0.81a</b>   |

245

246 ¶ CSA, consortium of agricultural land CSP; pine soil consortium; CSC; consortium of cedar floor. Pi = inoculated plants. Values are  
247 averages  $\pm$  standard error of the mean, n = 10.

248

249

250

251

252

253

254

255

256

257

258

259

260

261

262

263 Table 2. Micronutrient content of the aerial part and root of *Pinus greggii* plants inoculated with three consortia of arbuscular mycorrhizal  
 264 fungi (AMF), 210 days after sowing

| 265 | Treatment ¶                  | Fe                      | Mn            | Zn           | Cu           | B            |
|-----|------------------------------|-------------------------|---------------|--------------|--------------|--------------|
| 266 | Aerial part                  |                         |               |              |              |              |
| 267 | <b>Plants not inoculated</b> | 0.12 ± 0.01d            | 0.36 ± 0.21b  | 0.28 ± 0.03c | 0.30 ± 0.02c | 0.42 ± 0.02b |
| 268 | Pi with CSA                  | 0.28 ± 0.02c            | 0.71 ± 0.38a  | 0.54 ± 0.02b | 0.69 ± 0.50b | 0.72 ± 0.51a |
| 269 | Pi with CSP                  | 0.49 ± 0.02a            | 0.94 ± 0.45a  | 0.85 ± 0.03a | 0.84 ± 0.71a | 0.90 ± 0.82a |
| 270 | Pi with CSC                  | 0.37 ± 0.02b            | 0.87 ± 0.39a  | 0.53 ± 0.03b | 0.79 ± 0.52b | 0.83 ± 0.52a |
| 271 | Root                         |                         |               |              |              |              |
| 272 | <b>Plants not inoculated</b> | 0.18 ± 0.02c            | 0.24 ± 0.02b  | 0.36 ± 0.02c | 0.45 ± 0.03c | 0.55 ± 0.03b |
| 273 | Pi with CSA                  | 0.36 ± 0.03b            | 0.55 ± 0.03a  | 0.47 ± 0.02b | 0.64 ± 0.22b | 0.75 ± 0.22a |
| 274 | Pi with CSP                  | 0.69 ± 0.3a             | 0.68 ± 0.023a | 0.73 ± 0.03a | 0.81 ± 0.71a | 0.84 ± 0.31a |
| 275 | Pi with CSC                  | 0.43 ± 0.02b            | 0.55 ± 0.020a | 0.59 ± 0.05b | 0.73 ± 0.59b | 0.77 ± 0.26a |
| 276 | Total                        |                         |               |              |              |              |
| 277 | <b>Plants not inoculated</b> | 0.30 ± 0.01c            | 0.6 ± 0.02c   | 0.64 ± 0.05c | 0.75 ± 0.03c | 0.97 ± 0.71b |
|     | Pi with CSA                  | 0.64 ± 0.3b             | 1.26 ± 0.81b  | 1.01 ± 0.32b | 1.33 ± 0.82b | 1.47 ± 0.82a |
|     | Pi with CSP                  | 1.18 ± 0.9 <sup>a</sup> | 1.62 ± 0.92a  | 1.58 ± 0.71a | 1.65 ± 0.91a | 1.74 ± 0.77a |
|     | Pi with CSC                  | 0.80 ± 0.05b            | 1.42 ± 0.80a  | 1.12 ± 0.36b | 1.52 ± 0.69a | 1.60 ± 0.58a |

278 ¶ CSA, consortium of agricultural land CSP; pine soil consortium; CSC; consortium of cedar floor. Pi = inoculated plants. Values are  
279 averages  $\pm$  standard error of the mean, n = 10.

280

281

282

283

284

285

286

287

288

289

290

291 Table 3. Aerial part relationships: macro root and micronutrients of *Pinus greggii* plants, 210 days after sowing inoculated with three  
 292 consortia of mycorrhizal fungi.

293

| Treatment           | N           | P           | K           | Ca          | Mg          | Fe          | Mn          | Zn   | Cu          | B           |
|---------------------|-------------|-------------|-------------|-------------|-------------|-------------|-------------|------|-------------|-------------|
| Pi with CSA         | 1,15        | 1,18        | 1,34        | 1,14        | 1,34        | 0,77        | 1,29        | 1,14 | 1,07        | 1,04        |
| Pi with CSP         | 1,36        | 1,39        | 1,31        | 1,08        | 1,07        | 0,71        | 1,38        | 1,16 | 1,03        | 1,07        |
| Pi with CSC         | 1,12        | 1,30        | 1,19        | 1,08        | 1,21        | 0,86        | 1,58        | 1,11 | 1,08        | 1,07        |
| Psi                 | 0,75        | 0,82        | 0,82        | 0,67        | 0,62        | 0,66        | 0,15        | 0,77 | 0,66        | 0,76        |
| Pi with CSA:<br>Psi | 1,53        | 1,43        | <b>1,63</b> | <b>1,70</b> | <b>2,16</b> | 1,16        | 8,6         | 1,48 | 1,62        | 1,36        |
| Pi with CSP:<br>Psi | <b>1,81</b> | <b>1,69</b> | 1,59        | 1,61        | 1,72        | 1,07        | <b>9,2</b>  | 1,50 | 1,56        | <b>1,40</b> |
| Pi with CSC:<br>Psi | 1,49        | 1,58        | 1,45        | 1,61        | 1,95        | <b>1,30</b> | <b>10,5</b> | 1,44 | <b>1,63</b> | <b>1,40</b> |

294



295 ¶ CSA, consortium of agricultural land CSP; pine soil consortium; CSC; consortium of cedar floor. Pi = inoculated plants. Values are  
296 averages  $\pm$  standard error of the mean, n = 10.

297

298

299

300

301

302

## 303 **Discussion**

### 304 **Plant growth**

305

306 Mycorrhizal fungi contribute to the growth and development of vascular plants. Multiple studies  
307 have shown that mycorrhizae also protect plants against soil pathogens. The increase in plant  
308 growth in terms of height and biomass after inoculation with AMF has been widely documented  
309 in angiosperms, but not in gymnosperms [1]. In the present work, *Pinus greggii* plants inoculated  
310 with AMF had increased height and greater shoot and root biomass compared to the non-inoculated  
311 plants.

312

### 313 **Mycorrhizal colonization**

314

315 AMF are characterized by intra- and intercellular growth in the root cortex and by the formation  
316 of hyphae and external hyphae. In the present work, colonization of 20 to 40% was observed in  
317 the *Pinus greggii* plants with the AMF consortia in addition to the presence of hyphae, vesicles  
318 and arbuscules. There are reports of AMF colonization in gymnosperms. Several authors [7, 11-  
319 15] have reported the presence of AMF hyphae and vesicles in the roots of *Pseudotsuga menziesii*,  
320 *Tsuga*, *Abies* and *P. muricata*. These reports indicate that although ectomycorrhizal symbioses are  
321 predominant in the structure and function of gymnosperm roots, AMF are present in the roots of  
322 these trees as well.

323

### 324 **Nutrient mobilization**

325

326 In the present work, the enhancement of macro- and micronutrients contents via AMF in  
327 gymnosperms is reported for the first time. Inoculation with all three AMF consortia in the  
328 neotropical pine *P. greggii* showed a beneficial effect in terms of growth, colonization and content  
329 of macro- and micronutrients in comparison with non-inoculated plants. Although nutrient  
330 mobilization by AMF has been extensively demonstrated in angiosperms, there are no reports of  
331 conspicuous nutrient contents enhancement in gymnosperms. This work reports the mobilization  
332 of N, K, Ca, Mg, Fe, Mn, Zn, Cu and B within the shoots and roots of gymnosperms. Previously,  
333 only two studies have reported a higher P content in the gymnosperm *Pseudotsuga menziesii* [11,  
334 12].

335 In the present work, Mg, Mn and Zn were mobilized in the shoots of plants inoculated with AMF.  
336 Mn contributes to the functioning of various biological processes, including photosynthesis, via  
337 the synthesis of chlorophyll, respiration and the assimilation of nitrogen. Mn also participates in  
338 the formation of chloroplasts, activates the growth of plants, promotes cellular lengthening in the  
339 roots and confers resistance to pathogens. The transfer of Mn in angiosperms inoculated with  
340 mycorrhizal fungi has been reported. For example, Bethlenfalvay and Franson [21] recorded high  
341 concentrations of Mn in the shoots of barley plants (*Hordeum vulgare*). The same authors reported  
342 increases in Mn and increased growth in wheat plants (*Triticum durum*) inoculated with the AMF  
343 *Glomus monosporum*. On the other hand Arines et al. [22] found that in red clover (*Trifolium*  
344 *pratense*), the total Mn transfer increased in plants inoculated with the mycorrhizal fungi  
345 *Gigaspora aurigloba* and *Glomus tenue* compared with non-inoculated plants. In the present work,  
346 the difference in the Mn content between mycorrhized and non-mycorrhized trees was greater in  
347 the roots than in the shoots, possibly because the mycorrhizae altered the spatial distribution of

348 this nutrient. The lower absorption of Mn by mycorrhized plants can be explained by the existence  
349 of a fungal mechanism that controls the absorption of Mn or by the effect of the fungi on the  
350 rhizosphere and surrounding soil. Previously, a decrease in Mn toxicity in the presence of AMF in  
351 soybeans has been documented.

352 Angiosperms colonized by AMF are often more resistant to excess Mn than plants not colonized  
353 by this fungus. Mg is an essential nutrient for plants and is critical for a wide range of functions.  
354 Mg is involved in photosynthesis and is a basic component of chlorophyll. Xiao et al. [23] observed  
355 greater biomass in the roots and shoots in orange plants (*Poncirus trifoliata*) and concluded that  
356 inoculation with the mycorrhizal fungus *Funneliformis mosseae* had positive effects on the growth  
357 and physiology under Mg-deficient conditions. Hassan Zare-Maivan et al. [24] observed that  
358 plants inoculated with mycorrhizae had significantly higher content of dry and fresh root weight  
359 and chlorophyll content than plants without mycorrhizae. Mycorrhizal colonization increased Mg  
360 uptake but decreased K uptake. Xiao et al. [23] suggested that the mycorrhizal fungus *Glomus*  
361 *versiforme* can improve the growth and distribution of Mg in orange seedlings grown in soil low  
362 in Mg. These authors reported that the concentrations of Mg in the shoots and roots, biomass yield  
363 and chlorophyll content increased with the inoculation of three species of mycorrhizal fungi,  
364 especially *Glomus versiforme*.

365 In the present work, significant nutritional transport of 10 macro- and micronutrients was observed,  
366 primarily Mg and Mn in the shoots of plants inoculated with the AMF consortium from the *Pinus*  
367 *hartwegii* forest.

368

## 369 **Conclusions**

370 This work demonstrates for the first time the functional importance of AMF in terms of growth  
371 and nutrient enhancement contents in gymnosperms. AMF allowed for the mobilization of nine  
372 nutrients, primarily Mg, Mn and Zn, to the roots and shoots of the gymnosperm *Pinus greggii*.  
373 Plants of *P. greggii* inoculated with AMF produced more biomass than non-inoculated plants. The  
374 total colonization of *P. greggii* varied depending on the source of inoculum 7 months after  
375 inoculation. Greater colonization was observed in *Pinus* plants inoculated with the mycorrhizal  
376 consortia from *Cupressus* forests. Additionally, this is the first study that illustrates the formation  
377 of arbuscules by arbuscular mycorrhizal fungi in gymnosperms. The presence of arbuscules, which  
378 we documented photographically for the first time in gymnosperm plants, shows that *P. greggii*  
379 establishes a functional mutualist symbiosis with the AMF, as the exchange of nutrients occurs in  
380 this structure. These results indicate that *Pinus greggii* improves its nutritional status in the early  
381 stages of its development by associating with AMF; thus, inoculation with these fungi should be  
382 considered if reforestation activities of pine forests are desired.

383

384

## 385 **Aknowledgements**

386 The first author thanks a PhD scholarship from CONACyT. The author of correspondance  
387 acknowledge CONACyT 2018-000007-01EXTV and COMECyT for the financial support to carry  
388 out an international sabbatical stay in the Kunming Institute of Botany, Chinese Academy of  
389 Sciences in Kunming, China.

390

391

392

393

## 394 **References**

- 395 1. Smith, S.E., Read, D.J. (2008) Mycorrhizal Symbiosis. Academic Press, New York,  
396 USA. p.787.
- 397 2. Jansa J., Wiemken A. & Frossard E. (2006) The effects of agricultural practices on  
398 arbuscular mycorrhizal fungi. Geological Society, London, Special Publications. 266:  
399 89–115.
- 400 3. Schüßler, A.; D. Schwarzott y C. Walker. (2001) A new fungal phylum, the  
401 *Glomeromycota* phylogeny and evolution phylogeny and evolution. Mycol.  
402 Res.105:1413-1421.
- 403 4. Schüssler A., Walker C. (2010) The Glomeromycota: a species list with new families  
404 and new genera: Edinburgh & Kew, UK: The Royal Botanic Garden; Munich,  
405 Germany: Botanische Staatssammlung Munich; Oregon, USA: Oregon State University.
- 406 5. Sharif, M. and Claassen, N. (2011) Action mechanisms of arbuscular mycorrhizal fungi  
407 in phosphorus uptake by *Capsicum annum* L. Pedosphere. 21(4):502-511.
- 408 6. Siqueira, J.O.; Lambais, M.R.; Sturmer, S.L. (2002) Fungos micorrízicos arbusculares:  
409 características, associação simbiótica e aplicação na agricultura. *Biotecnologia Ciência*  
410 *y Desenvolvimento*. 25:12-21.
- 411 7. Smith, J., Johnson, K.A., Cázares, E. (1998) Mycorrhizal colonization of seedlings of  
412 Pinaceae and Betulaceae following spore inoculation with *Glomus intraradices*.  
413 Mycorrhiza. 7:279-285.

- 414 8. Wagg C, Pautler M, Hugues B, Massicotte R, Peterson L. (2008) The co-occurrence of  
415 ectomycorrhizal, arbuscular mycorrhizal, and dark septate fungi in seedlings of four  
416 members of the Pinaceae. *Mycorrhiza*. 18:103–110.
- 417 9. Cázares E, Trappe JM (1993) Vesicular endophytes in roots of the Pinaceae.  
418 *Mycorrhiza*. 2:153–156.
- 419 10. Cázares E, Smith JE (1996) Occurrence of vesicular-arbuscular mycorrhizae in  
420 *Pseudotsuga menziesii* and *Tsuga heterophylla* seedlings grown in Oregon Coast Range  
421 soils. *Mycorrhiza*. 6:65–67.
- 422 11. Ducic T, Berthold D, Langenfeld-Heyser R, Beese F, Polle A (2009) Mycorrhizal  
423 communities in relation to biomass production and nutrient use efficiency in two  
424 varieties of Douglas fir (*Pseudotsuga menziesii* var. *menziesii* and var. *glauca*) in  
425 different forest soils. *Soil Biology & Biochemistry*. 41:742–753.
- 426 12. Salgado, M.E. Barroetaveña, C. Rajchenberg, M. (2013) *Pseudotsuga menziesii*  
427 invasion in native forests of Patagonia, Argentina: What about mycorrhizas?. *Acta*  
428 *Oecologica*. 49:5-11.
- 429 13. Chilvers GA, Lapeyrie FF, Horan DP. (1987) Ectomycorrhizal vs endomycorrhizal  
430 fungi within the same root system. *New Phytol*. 107:441–448.
- 431 14. Horton, R.T, Cázares, E., Bruns, D. T. (1998) Ectomycorrhiza, vesicular–arbuscular  
432 and dark septate fungal colonization of bishop pine (*Pinus muricata*) seedlings in the  
433 first 5 months of growth after wildfire. *Mycorrhiza*. 8:11–18.
- 434 15. Wagg C, Maderia P, Peterson R. (2011) Arbuscular mycorrhizal fungal phylogeny-  
435 related interactions with a non-host. *Symbiosis*. DOI: 10.1007/s13199-011-0107-5
- 436 16. García-Díaz, Silvia E., Aldrete, Arnulfo, Alvarado-Rosales, Dionicio, Cibrián-Tovar,

- 437 David, Méndez-Montiel, José T., Valdovinos-Ponce, Guadalupe, Equihua-Martínez,  
438 Armando. (2017) Efecto de *Fusarium circinatum* en la geminación y crecimiento de  
439 plántulas de *Pinus greggii* en tres sustratos. *Agrociencia*. 51: 895-908.
- 440 17. Bremner JM. (1975) Total nitrogen. In Black CA. (Ed.), *Methods of soil analysis*  
441 Madison, Wisconsin: American Society of Agronomy. p. 1149-1178.
- 442 18. Allen, S. E., Grimshaw, H. M., Parkinson, J.A. & Quarmby, C. (1997) *Chemical*  
443 *analysis of ecological materials*. Oxford, UK: Blackwell Scientific Publications.
- 444 19. Phillips JM, Hayman D.S. (1970) Improved procedures for clearing roots and staining  
445 parasitic and vesicular-arbuscular mycorrhizal fungi for rapid assessment of infection.  
446 *Transactions British Mycological Society*. 55:158-161.
- 447 20. SAS Institute Inc. (2002) *The SAS system for windows*, ver. 9.0. SAS Institute Inc,  
448 Cary, North Carolina. USA.
- 449 21. Bethlenfalvay G.J. Franson R.L. (1989) Manganese toxicity alleviated by mycorrhizae  
450 in soybean. *J Plant Nutr*. 12:953- 970.
- 451 22. Arines J. Vilariño A. and Sainz M. (1989) Effect of different inocula of vesicular-  
452 arbuscular mycorrhizal fungi on manganese content and concentration in red clover  
453 (*Trifolium pratense* L.) plants. *New Phytol*. 112, 215–219.
- 454 23. Xiao, J. X., C. Y. Hu, Y. Y. Chen, B. Yang and J. Hua. (2014) Effects of low  
455 magnesium and an arbuscular mycorrhizal fungus on the growth, magnesium  
456 distribution and photosynthesis of two citrus cultivars. *Scientia Horticulturae*. 177:14-20.
- 457 24. Hassan Zare-Maivan, Narges Khanpour-Ardestani & Faezeh Ghanati. (2017) Influence  
458 of mycorrhizal fungi on growth, chlorophyll content, and potassium and magnesium  
459 uptake in maize, *Journal of plant Nutrition*. 40:(14).2026-2032.





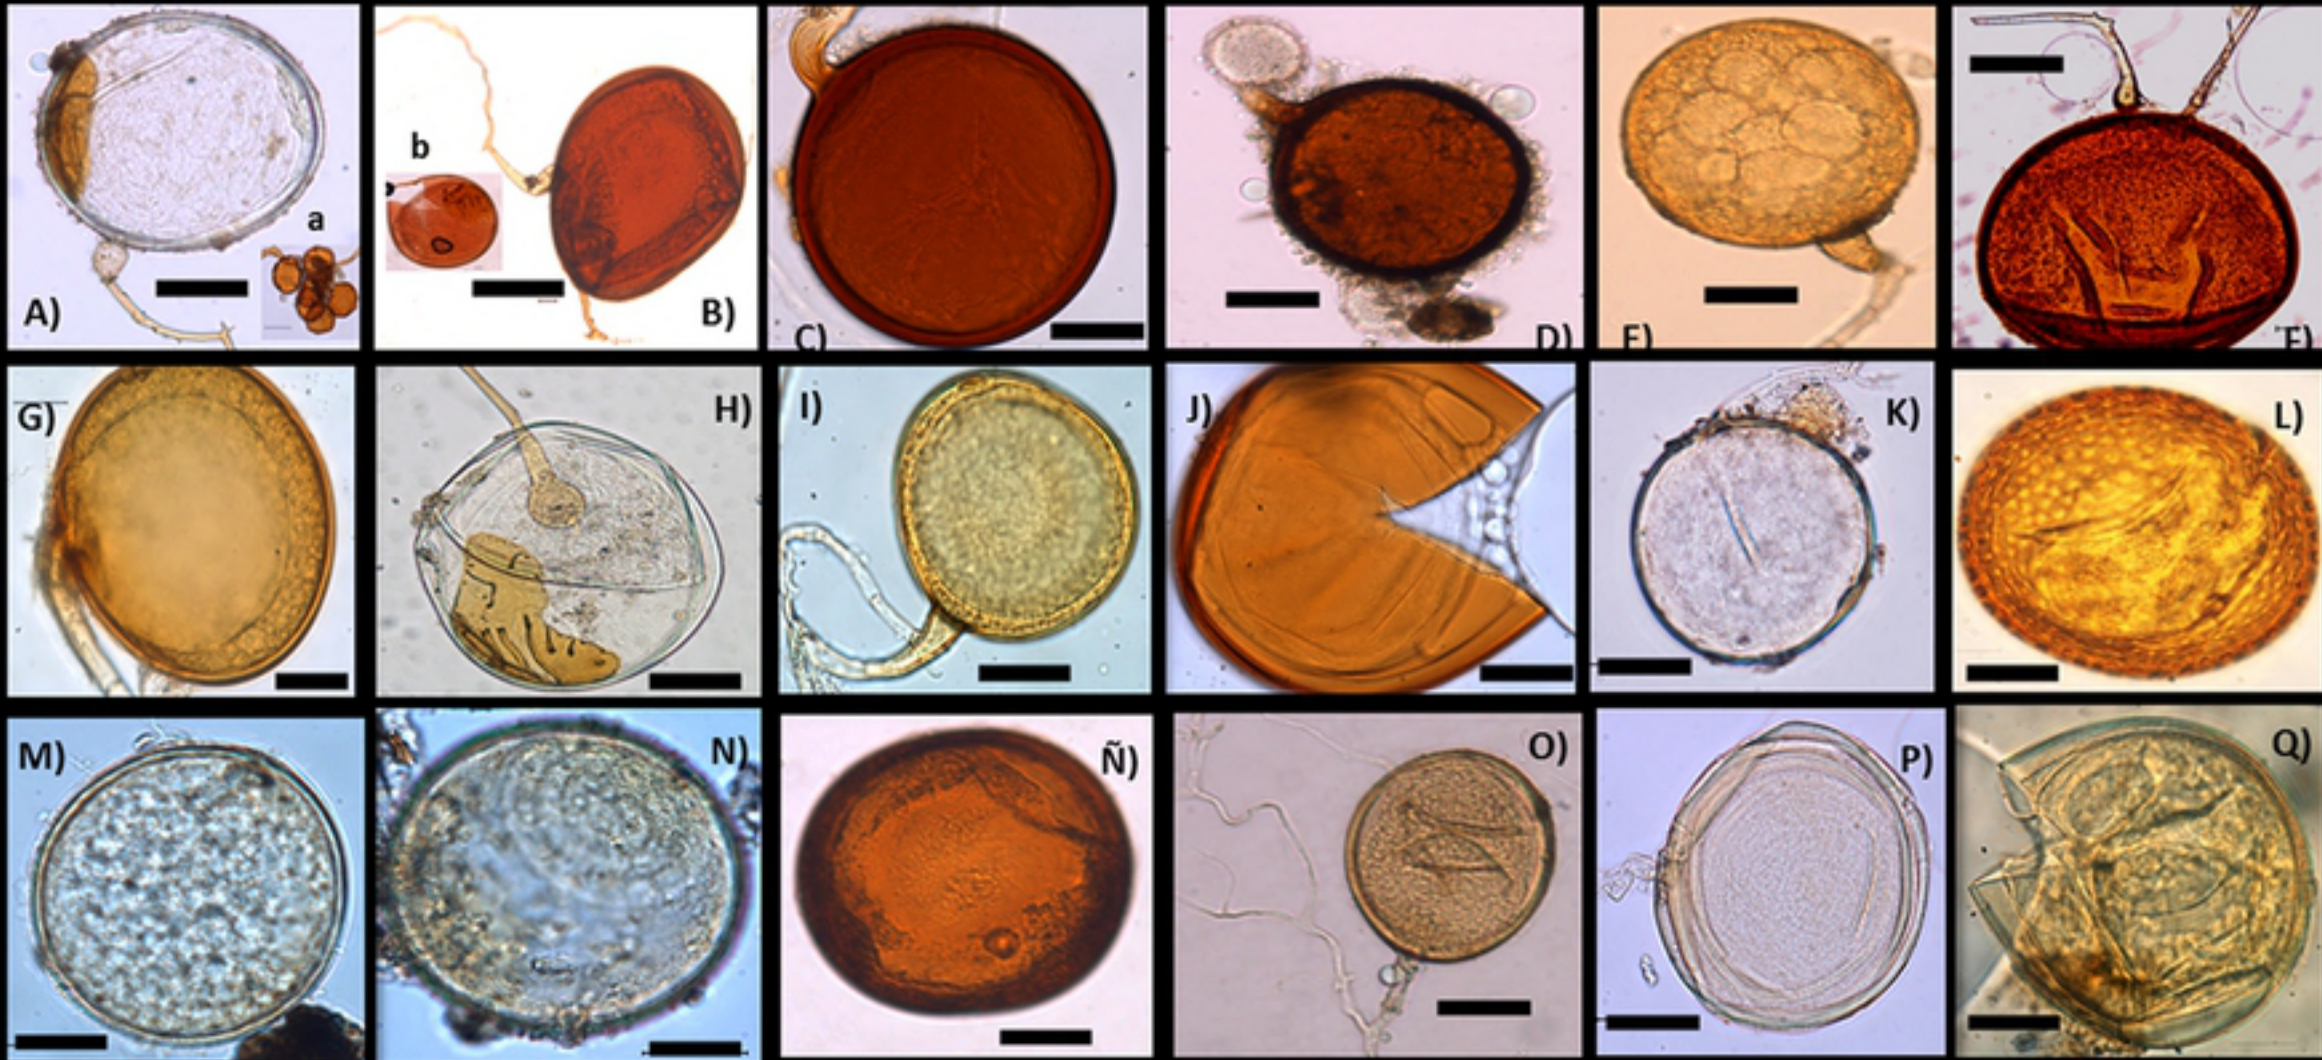

Fig 1

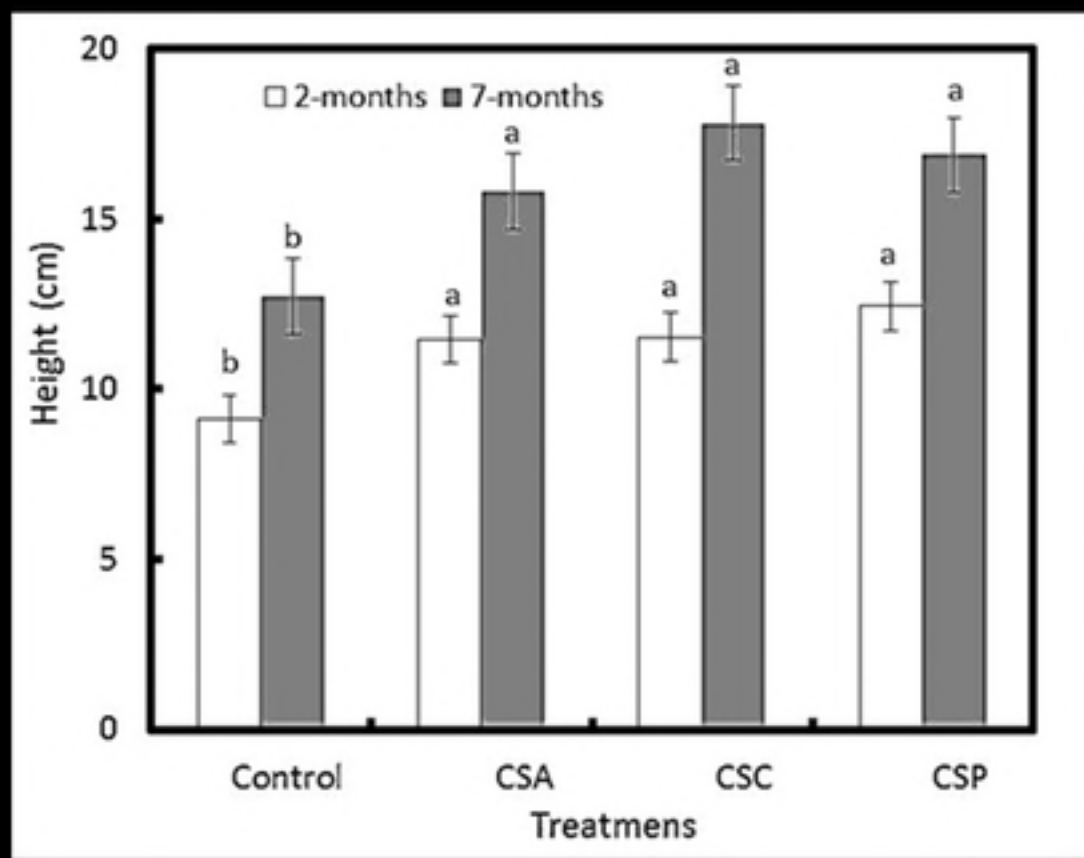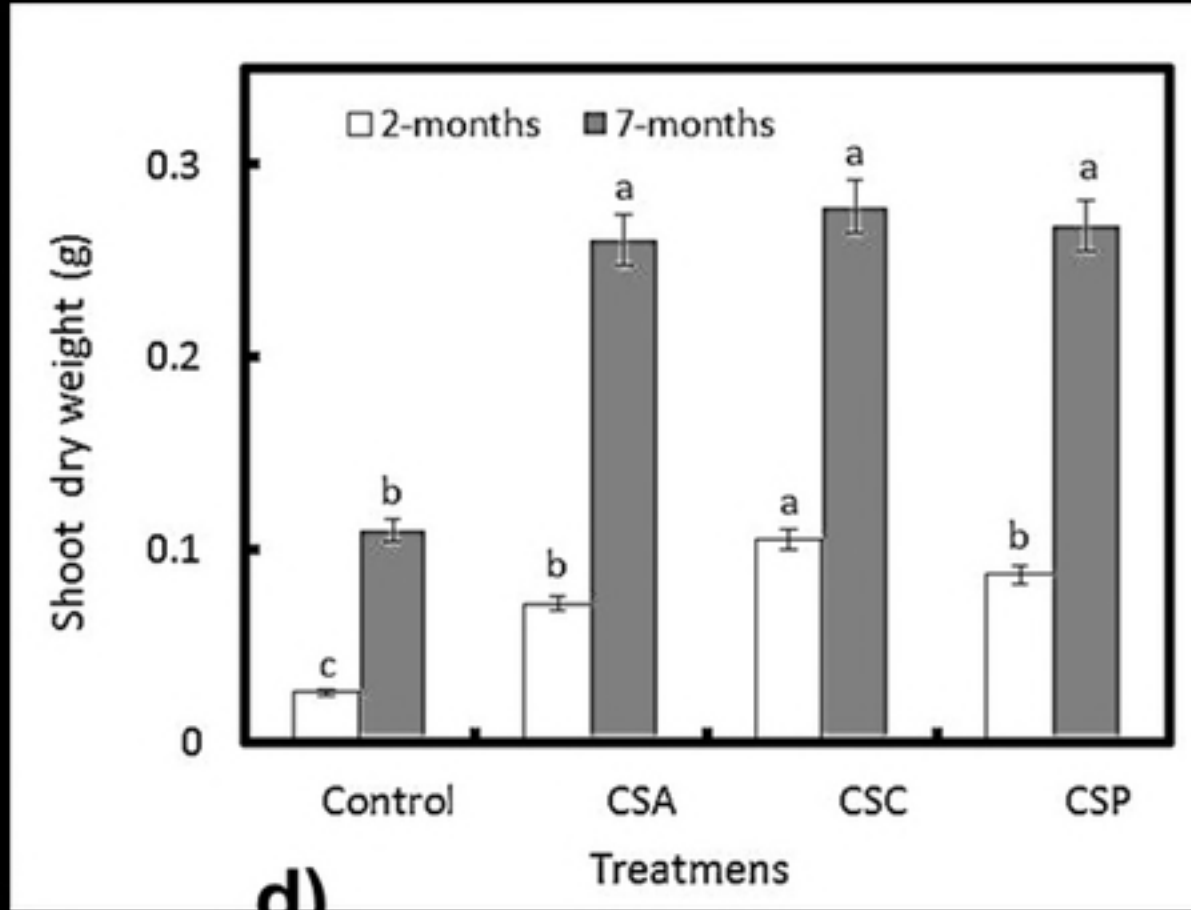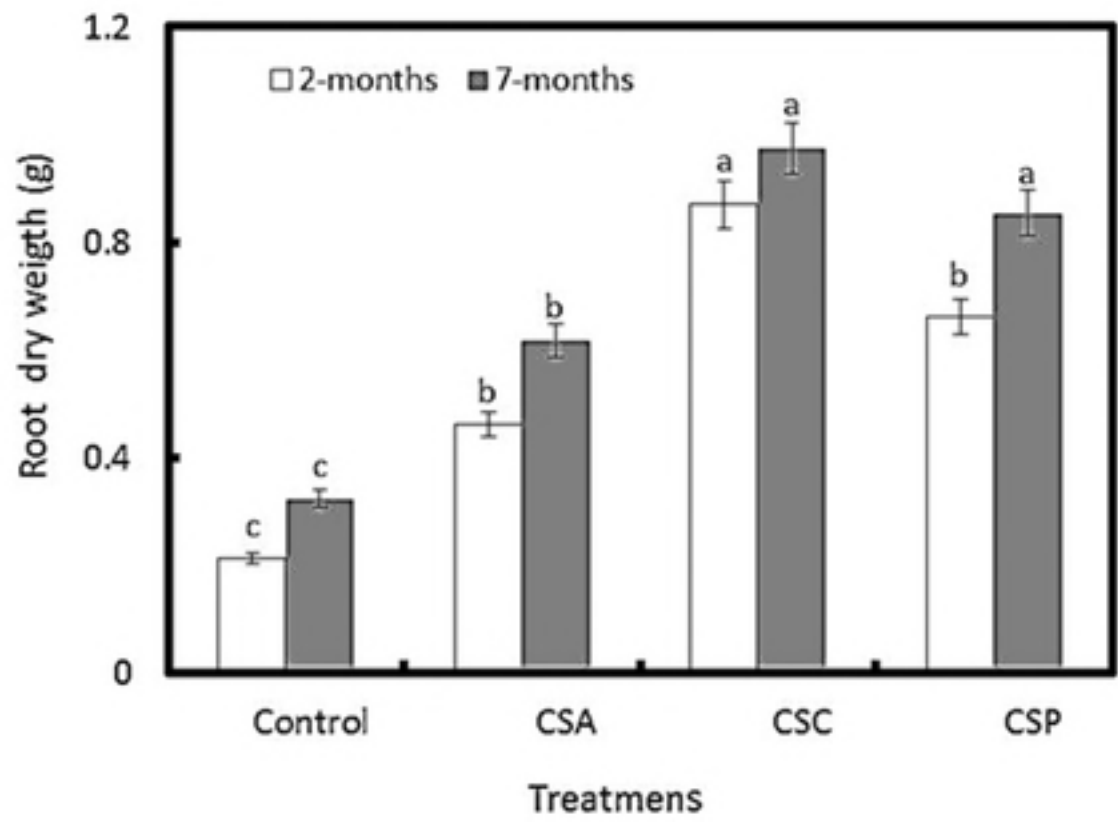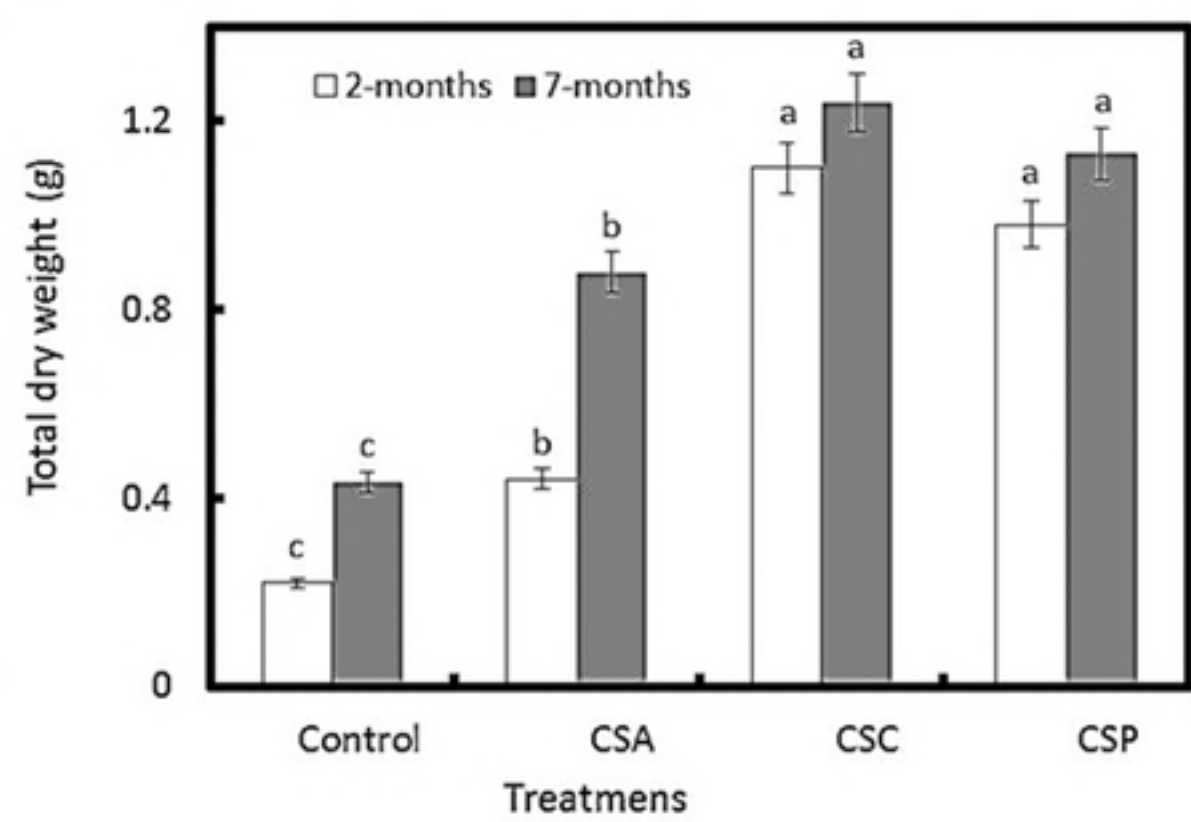

Fig 2

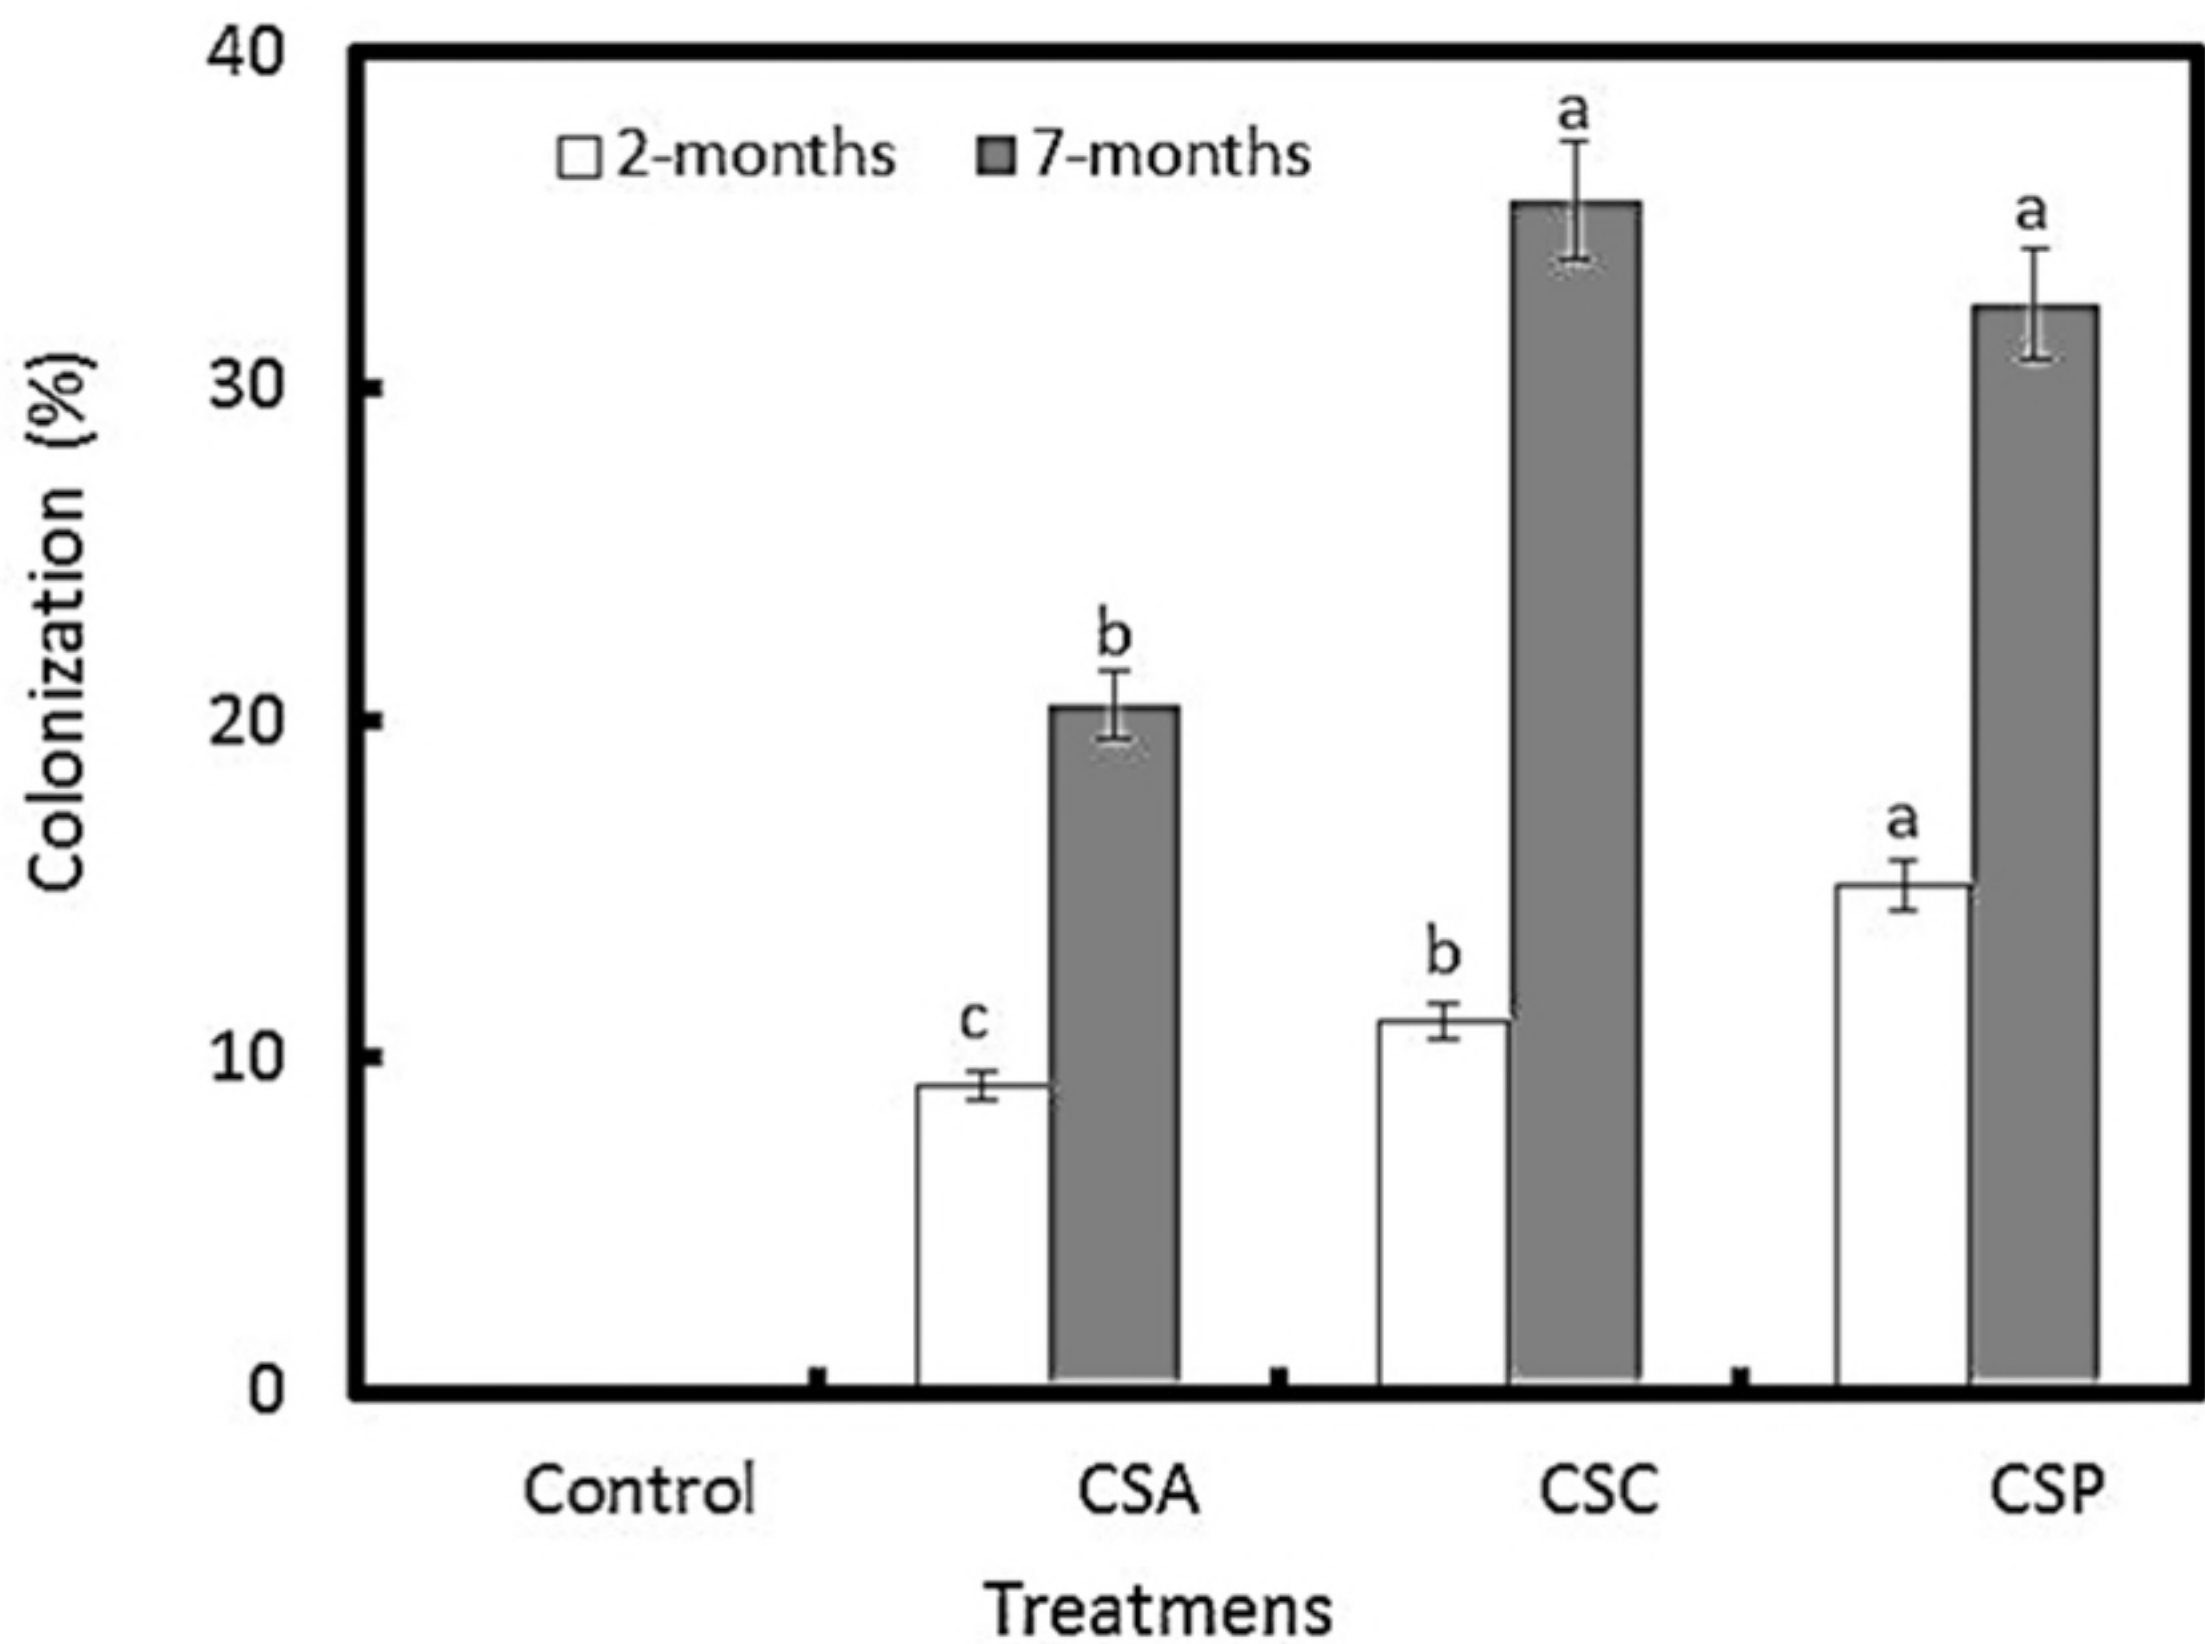

Fig 3

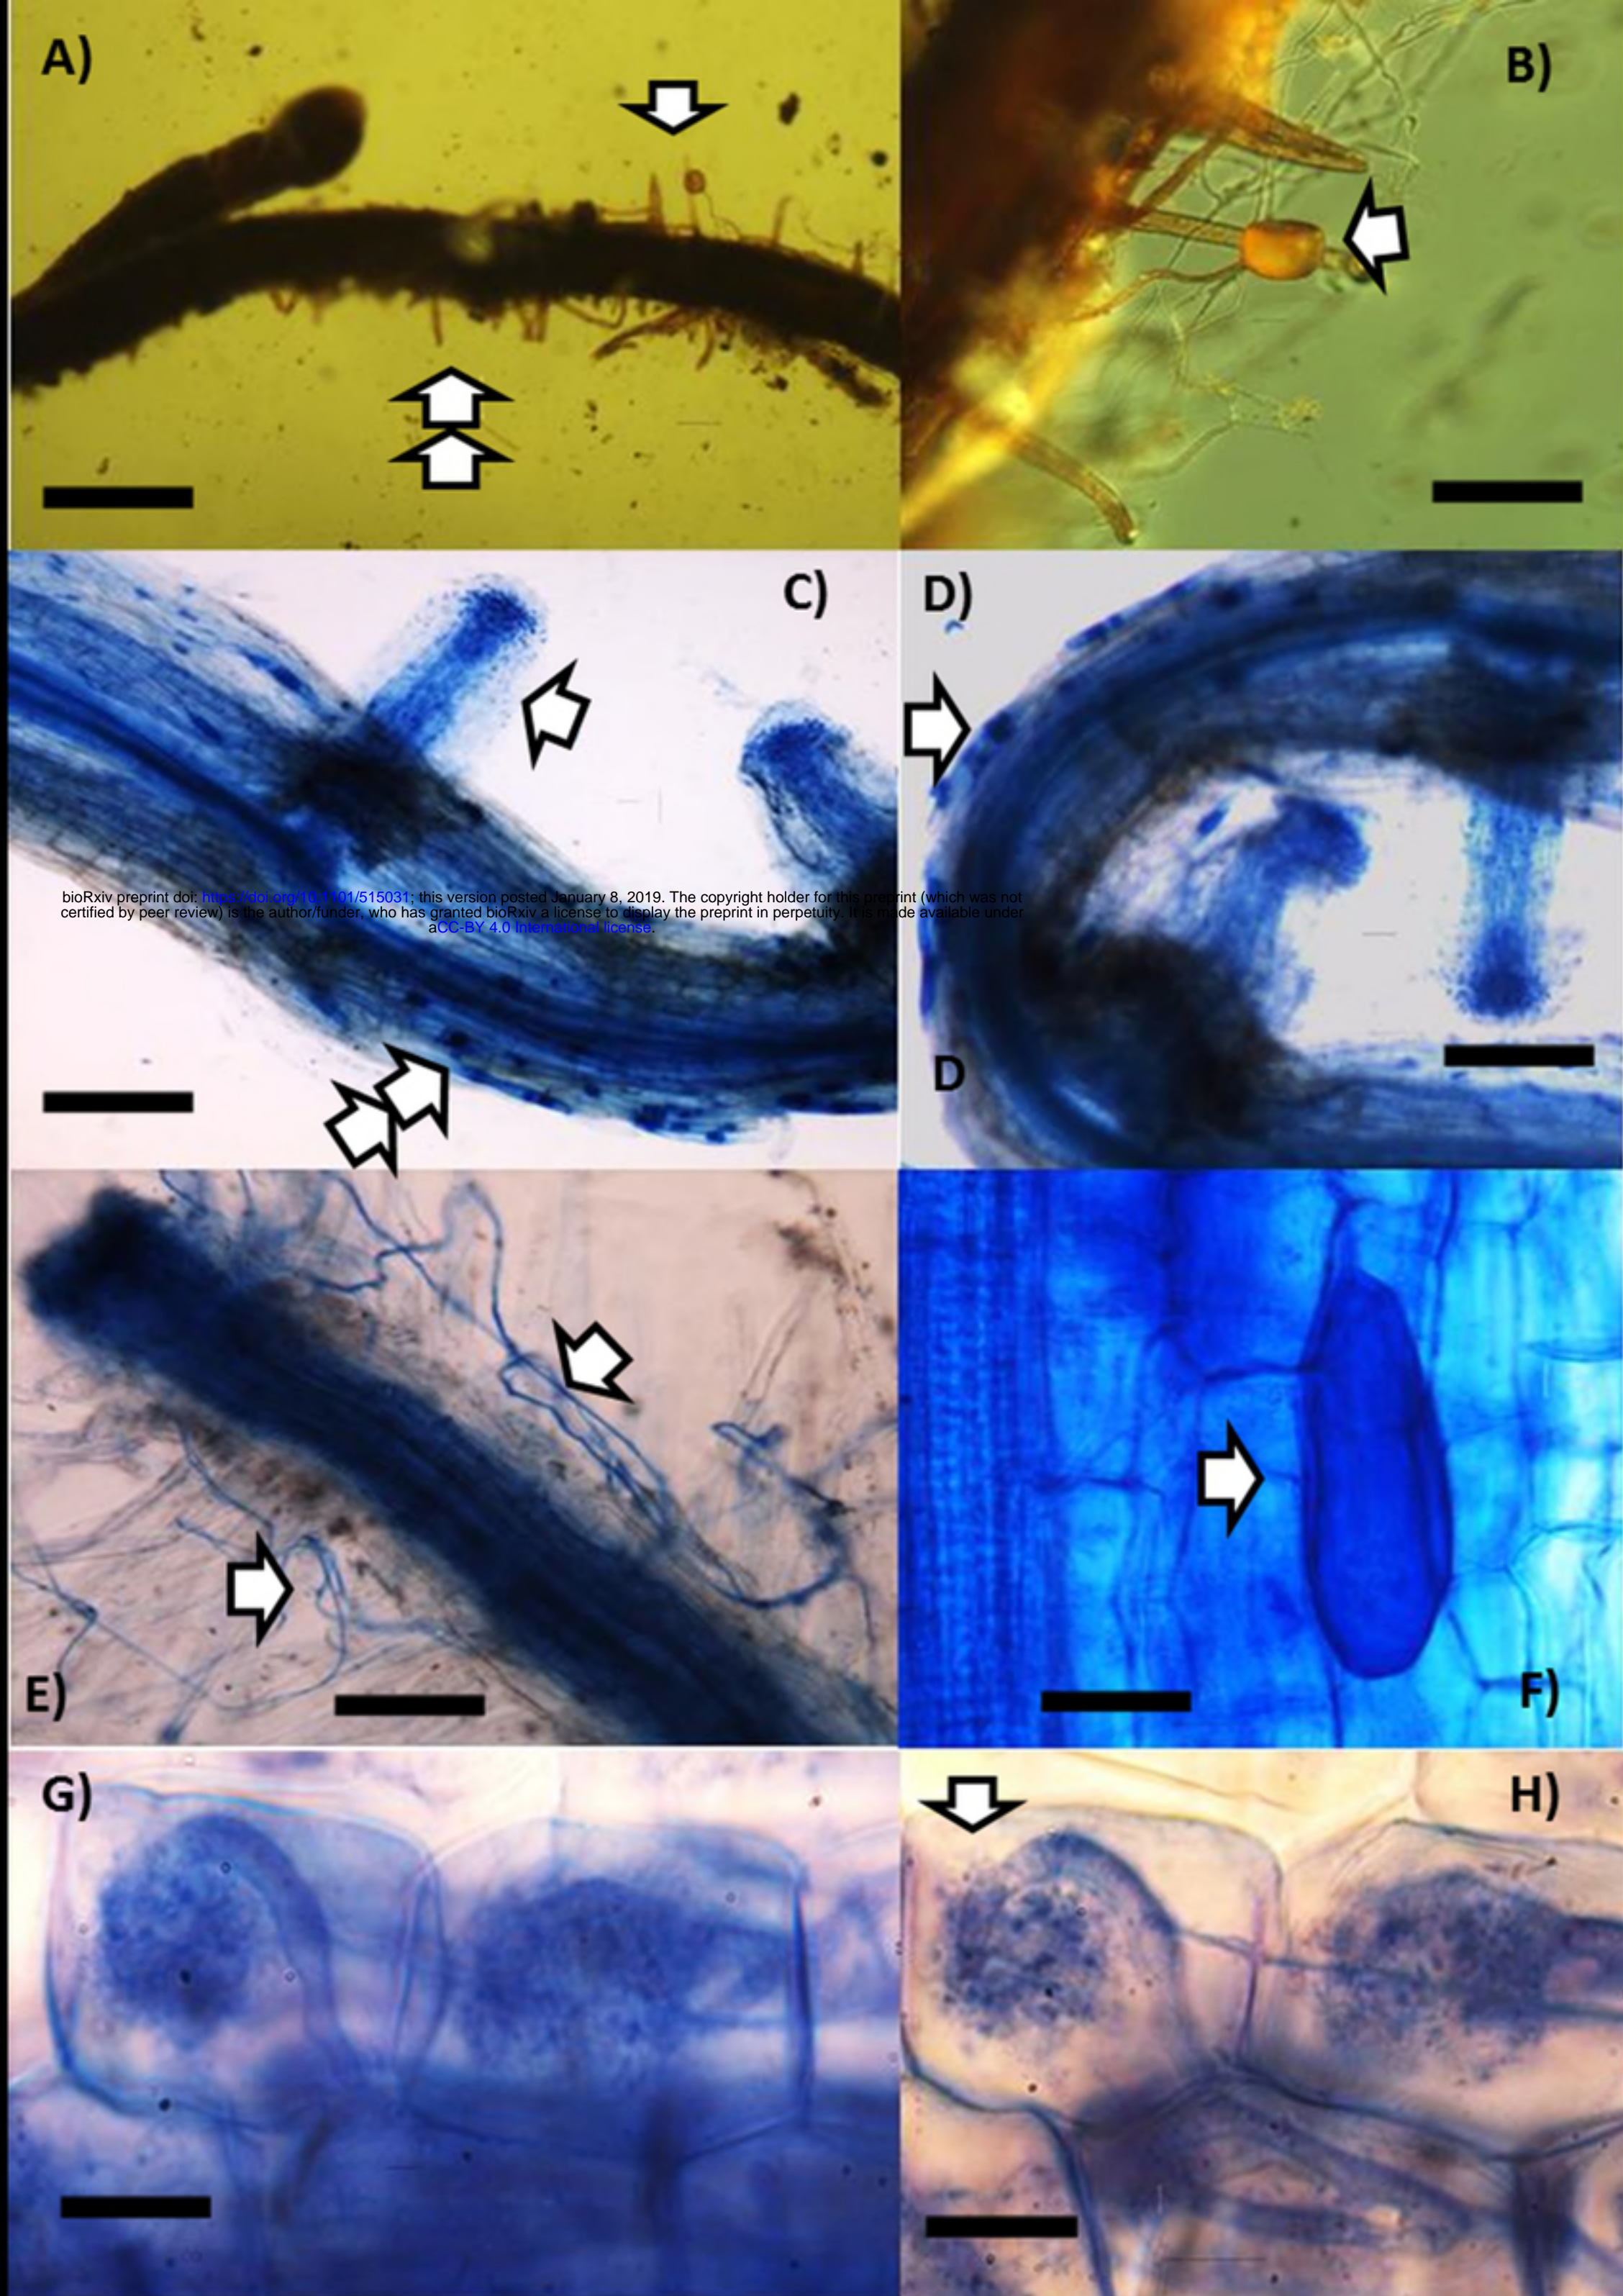

Fig 4
